# Supplementary material for: Host- and Age-Dependent Transcriptional Changes in Mycobacterium tuberculosis Cell Envelope Biosynthesis Genes after Exposure to Human Alveolar Lining Fluid
Source: MDPI journal article supplement (doi:10.3390/ijms23020983), 2022-01-17
Supplement: s1 [file s1]

## SUPPLEMENTAL MATERIAL

### FIGURES

**Supplemental Fig 1. Comparison of gene expression results between targeted qPCR (qPCR) and multiplex qPCR (Biomark) for selected cell envelope genes in ALF-exposed *M.tb*.** *M.tb* H<sub>37</sub>R<sub>v</sub> was exposed to individual healthy human ALFs (n=6 for qPCR and n=2 for Biomark). Relative expression was calculated with the  $2^{-\Delta\Delta CT}$  method (ALF-exposed *M.tb* vs. heat-inactivated ALF-exposed *M.tb*) using *rpoB* as the reference gene. Values are plotted as the means  $\pm$  SEM (Prism v9). Statistical significance between the two methods was calculated for each of the genes with a two-way ANOVA using the Sidak's correction for multiple comparisons test with a 95% confidence interval, ns: non-significant.

### TABLES

**Supplemental Table 1. List of primers used for multiplex qPCR assay using the Biomark HD instrument.** The table includes gene name, locus tag, product, function, pathway and functional category obtained from Mycobrowser (<https://mycobrowser.epfl.ch>) and KEGG (<https://www.kegg.jp>), sequences for forward and reverse primers, primer melting temperature ( $T_m$ ), 3' complementarity, and product size.

**Supplemental Table 2. Relative expression of *M.tb* cell envelope biogenesis genes.** Gene expression was obtained after multiplex qPCR assay with the Biomark 96.96 IFC Dynamic Array IFC for Gene Expression (Fluidigm). Fold change values were calculated with the  $2^{-\Delta\Delta CT}$  method (ALF-exposed *M.tb* vs. corresponding heat-inactivated ALF-exposed *M.tb*) using *rpoB* as the reference gene. Statistical significance of A-ALF-exposed *M.tb* vs. E-ALF-exposed *M.tb* was calculated with a two-way ANOVA for multiple comparisons with an uncorrected Fisher's LSD test. \* p-value < 0.05; \*\* p-value < 0.005; \*\*\* p-value < 0.0005; \*\*\*\* p-value < 0.00005.
