# Supplementary material for: Host- and Age-Dependent Transcriptional Changes in Mycobacterium tuberculosis Cell Envelope Biosynthesis Genes after Exposure to Human Alveolar Lining Fluid
Source: Int J Mol Sci. 2022 Jan 17;23(2):983. doi: 10.3390/ijms23020983 (PMC8780516; doi:10.3390/ijms23020983)
Supplement: Supplementary file 1 [file ijms-23-00983-s001.zip › Supplemental Table S1.xlsx]

## Sheet: Primers for Biomark
Category	Locus tag H37Rv	Gene name	Product	Function	Pathway	Functional Category (Mycobrowser)	Primer	Sequence	Tm (°C)	3' compl	Product size	Reference
Reference gene	Rv0667	rpoB	DNA-directed RNA polymerase (beta chain) RpoB (transcriptase beta chain) (RNA polymerase beta subunit)	Catalyzes the transcription of DNA into RNA using the four ribonucleoside triphosphates as substrates [catalytic activity: N nucleoside triphosphate = N diphosphate + {RNA}(N)]	RNA polymerase	information pathways	rpoB-F	ACGAGTGCAAAGACAAGG	55.21	0	94	This study
							rpoB-R	GTCTGACTCTTGATCTCACC	54.92	0		This study
Lipid metabolism	Rv2610c	pimA	alpha-(1-2)-phosphatidylinositol mannosyltransferase PimA	Involved in the first mannosylation step in phosphatidylinositol mannoside biosynthesis (transfer of mannose residues onto PI, leading to the synthesis of phosphatidylinositol monomannoside)	PI, PIMs, LM and ManLAM biosynthesis	lipid metabolism	pimA-F	TGCCTGATTACTTTGTCTCC	55.06	0	131	This study
							pimA-R	TACGTCGAAATCACCATGC	55.75	3		This study
Lipid metabolism	Rv2188c	pimB	alpha-(1-6)-phosphatidylinositol monomannoside mannosyltransferase PimB	Involved in PIM biosynthesis	PI, PIMs, LM and ManLAM biosynthesis	lipid metabolism	pimB-F	GGTTTGCTTCTGCGTTCG	57.48	2	151	This study
							pimB-R	CGCGACAGACACACTACC	57.85	0		This study
Lipid metabolism	Rv1500	pimF	glycosyltransferase PimF	Function unknown	PI, PIMs, LM and ManLAM biosynthesis	intermediary metabolism and respiration	pimF-F	CGACTCAGACTTGGAAGAGG	57.58	0	92	This study
							pimF-R	CGTGGCAACCAAATACTACG	59.11	2		This study
Lipid metabolism	Rv2612c	pgsA	PI synthase PgsA1 (phosphatidylinositol synthase) (CDP-diacylglycerol--inositol-3-phosphatidyltransferase)	Catalyzes the transfer of a free alcohol (inositol) onto CDP-diacylglycerol. The product of this putative ORF seems be essential to mycobacteria [catalytic activity: CDP-diacylglycerol + myo-inositol = CMP + phosphatidyl 1D-myo-inositol]. PgsA1 utilises inositol-phosphate rather than inositol, in contrast to its Eukaryotic ortholog (see Gr&#228;ve et al. 2019)	PI, PIMs, LM and ManLAM biosynthesis	lipid metabolism	pgsA-F	TCTGCTGTGGTGGATAGC	56.31	2	99	This study
							pgsA-R	GCCTTGATGTAAGAGATCACC	56.12	2		This study
Lipid metabolism	Rv0557	mgtA	Mannosyltransferase MgtA, GDP-mannose-dependent alpha-mannosyltransferase similar to PimB	Involved in lipomannan (LM) biosynthesis	PI, PIMs, LM and ManLAM biosynthesis	lipid metabolism	mgtA-F	CACGGTATGGCAAAGAGC	56.19	2	62	This study
							mgtA-R	ACCGGAATGTACGAAGACG	57.29	2		This study
Lipid metabolism	Rv3793	embC	Integral membrane indolylacetylinositol arabinosyltransferase EmbC (arabinosylindolylacetylinositol synthase)	Involved in the biosynthesis of the mycobacterial cell wall arabinan and resistance to ethambutol (EMB; dextro-2,2'-(ethylenediimino)-DI-1-butanol). Polymerizes arabinose into the arabinan of arabiogalactan [catalytic activity: UDP-L-arabinose + indol-3-ylacetyl-myo-inositol = UDP + indol-3-ylacetyl-myo-inositol L-arabinoside]	PI, PIMs, LM and ManLAM biosynthesis	cell wall and cell processes	embC-F	TCAAAGACGACTGGTTTAGG	55.04	1	91	This study
							embC-R	GTTCCTAGGTTCAGATCAGC	55.26	2		This study
Lipid metabolism	Rv1267c	embR	transcriptional regulatory protein EmbR	Involved in transcriptional mechanism. Thought to regulate the biosynthesis of the mycobacterial cell wall arabinan and resistance to ethambutol (EMB; dextro-2,2'-(ethylenediimino)-DI-1-butanol), regulating EMBA|Rv3794 and EMBB|Rv3795	Trancription factor: regulation of lipomannan/lipoarabinomannan ratio	regulatory proteins	embR-F	TCACCGCCTACTACCTCTCC	57.1	0	74	This study
							embR-R	GGCCAGTGTTGTCTTCACC	55.9	1		This study
Lipid metabolism	Rv2623	Rv2623	Universal stress protein family protein TB31.7n	Might negatively regulate transporter Rv1747	Not assigned	virulence, detoxification, adaptation	Rv2623-F	GTGGTTGAACAGGCTTCGC	59.72	2	135	This study
							Rv2623-R	CCCACTTCCGAGACAACCC	60	0		This study
Lipid metabolism	Rv1747	Rv1747	conserved transmembrane ATP-binding protein ABC transporter	Thought to be involved in active transport of undetermined substrate (possibly lipooligosaccharide) across the membrane. Responsible for energy coupling to the transport system and for the translocation of the substrate across the membrane	Transporter	cell wall and cell processes	Rv1747-F	AGGTTACTTCGTCTTTCTGG	54.73	0	139	This study
							Rv1747-R	CAGCAACACTAGGATCTGG	54.99	2		This study
Lipid metabolism	Rv2244	acpM	Meromycolate extension acyl carrier protein AcpM	Involved in fatty acid biosynthesis (mycolic acids synthesis); involved in meromycolate extension	mycolic acid biosynthesis	lipid metabolism	acpM-F	AGACCGAGGACAAGTACGG	58.44	1		This study
							acpM-R	TCGAGCTTCTGGATGTAGGC	59.25	2		This study
Lipid metabolism	Rv2245	kasA	3-oxoacyl-[acyl-carrier protein] synthase 1 KasA (beta-ketoacyl-ACP synthase) (KAS I)	Involved in fatty acid biosynthesis (mycolic acids synthesis); involved in meromycolate extension. Catalyzes the condensation reaction of fatty acid synthesis by the addition to an acyl acceptor of two carbons from malonyl-ACP [catalytic activity: acyl-[acyl-carrier protein] + malonyl-[acyl-carrier protein] = 3-oxoacyl-[acyl-carrier protein] + [acyl-carrier protein] + CO(2)]	mycolic acid biosynthesis	lipid metabolism	kasA-F	ACGTGGAAGGGTCTGTTGG	56.8	0	76	This study
							kasA-R	CTAGATCCCACTTGGTGACG	54.5	2		This study
Lipid metabolism	Rv2246	kasB	3-oxoacyl-[acyl-carrier protein] synthase 2 KasB (beta-ketoacyl-ACP synthase) (KAS I)	Involved in fatty acid biosynthesis (mycolic acids synthesis); involved in meromycolate extension. Catalyzes the condensation reaction of fatty acid synthesis by the addition to an acyl acceptor of two carbons from malonyl-ACP [catalytic activity: acyl-[acyl-carrier protein] + malonyl-[acyl-carrier protein] = 3-oxoacyl-[acyl-carrier protein] + [acyl-carrier protein] + CO(2)]	mycolic acid biosynthesis	lipid metabolism	kasB-F	ATCTGGTAAACCTCGATCC	53.62	2	88	This study
							kasB-R	GAGTTATTGATCGCATACCG	54.13	2		This study
Lipid metabolism	Rv3800c	pks13	Polyketide synthase Pks13	Involved in the final steps of mycolic acid biosynthesis. Catalyses the condensation of two fatty acyl chains	mycolic acid biosynthesis	lipid metabolism	pks13-F	GCAACTGGGTGGGTAAGG	55	0	126	This study
							pks13-R	CGGTCAGGTCTTCTATGTCG	54.7	2		This study
Lipid metabolism	Rv1484	inhA	NADH-dependent enoyl-[acyl-carrier-protein] reductase InhA (NADH-dependent enoyl-ACP reductase)	This isozyme is involved in mycolic acid biosynthesis. Second reductive step in fatty acid biosynthesis. Involved in the resistance against the antituberculosis drugs isoniazid and ethionamide [catalytic activity: acyl-[acyl-carrier protein] + NAD(+) = trans-2,3-dehydroacyl-[acyl-carrier protein] + NADH]	mycolic acid biosynthesis, fatty acid biosynthesis	lipid metabolism	inhA-F	ATTCGATTGGGTTCATGCCG	58.98	2	83	This study
							inhA-R	GATGCCCTTGGACACATCC	58.2	2		This study
Lipid metabolism	Rv0904c	accD3	acetyl-coenzyme A carboxylase carboxyl transferase (subunit beta) AccD3 (accase beta chain)	This protein is a component of the acetyl coenzyme A carboxylase complex; first, biotin carboxylase catalyzes the carboxylation of the carrier protein and then the transcarboxylase transfers the carboxyl group to form malonyl-CoA [catalytic activity ATP + acetyl-CoA + HCO(3)(-) = ADP + phosphate + malonyl-CoA]	fatty acid metabolism	lipid metabolism	accD3-F	GGTAGCCGACTCCTATGC	56.61	2	132	This study
							accD3-R	AGGAAGTCGAACTCACAGG	56.4	0		This study
Lipid metabolism	Rv0533c	fabH	3-oxoacyl-[acyl-carrier-protein] synthase III FabH (beta-ketoacyl-ACP synthase III) (KAS III)	Involved in fatty acid biosynthesis. Catalyzes the condensation reaction of fatty acid synthesis by the addition to an acyl acceptor of two carbons from malonyl-ACP. KAS III catalyzes the first condensation reaction which initiates fatty acid synthesis and may therefore play a role in governing the total rate of fatty acid production. Possesses both acetoacetyl-ACP synthase and acetyl transacylas…	fatty acid metabolism	lipid metabolism	fabH-F	CCCACGATAGACATGTACG	54.95	2	97	This study
							fabH-R	GTCCAATGCCTTGAAACG	54.42	2		This study
Lipid metabolism	Rv0242c	fabG4	3-oxoacyl-[acyl-carrier protein] reductase FabG4 (3-ketoacyl-acyl carrier protein reductase)	Involved in the fatty acid biosynthesis pathway (first reduction step) [catalytic activity: (3R)-3-hydroxyacyl-[acyl-carrier protein] + NADP+ = 3-oxoacyl-[acyl-carrier protein] + NADPH]	fatty acid metabolism	lipid metabolism	fabG4-F	GACCTGGTAGGAAACAACC	55.11	2	124	This study
							fabG4-R	GTACCGGAGTAAAGAACTCG	55.36	2		This study
Lipid metabolism	Rv0243	fadA2	acetyl-CoA acyltransferase FadA2 (3-ketoacyl-CoA thiolase) (beta-ketothiolase)	Function unknown, but involved in lipid degradation [catalytic activity: acyl-CoA + acetyl-CoA = CoA + 3-oxoacyl-CoA]	fatty acid metabolism	lipid metabolism	fadA2-F	GGCATCAAACGCGTAGACC	59.29	0		This study
							fadA2-R	GTTAGGCCGCAGATTGTCG	58.99	2		This study
Lipid metabolism	Rv0632c	echA3	enoyl-CoA hydratase EchA3 (enoyl hydrase) (unsaturated acyl-CoA hydratase) (crotonase)	Could possibly oxidize fatty acids using specific components [catalytic activity: (3S)-3-hydroxyacyl-CoA = trans-2(or 3)-enoyl-CoA + H(2)O]	fatty acid metabolism	lipid metabolism	echA3-F	GGCTTCGACCTGAAGATCC	54.9	2	96	This study
							echA3-R	GTAGGACAAGAGGCGATACG	54.7	2		This study
Lipid metabolism	Rv1521	fadD25	fatty-acid-AMP ligase FadD25 (fatty-acid-AMP synthetase) (fatty-acid-AMP synthase)	Function unknown, but involvement in lipid degradation	fatty acid metabolism	lipid metabolism	fadD25-F	ACAGCTAAGAGAACATGGG	54.15	0	67	This study
							fadD25-R	ATAGTCGAGGCTTTGTGG	53.95	0		This study
Lipid metabolism	Rv3252c	alkB	transmembrane alkane 1-monooxygenase AlkB (alkane 1-hydroxylase) (lauric acid omega-hydroxylase) (omega-hydroxylase) (fatty acid omega-hydroxylase) (alkane hydroxylase-rubredoxin)	Thought to be involved in fatty acid metabolism. Generates octanol and oxidized rubredoxin from octane and reduced rubredoxin. Also hydroxylates fatty acids in the omega-position [catalytic activity: octane + reduced rubredoxin + (O)2 = 1-octanol + oxidized rubredoxin + H(2)O]	fatty acid metabolism	lipid metabolism	alkB-F	CAAACCTCAGTTGGCTCGG	58.75	1	132	This study
							alkB-R	GCGAATCCTTCTTGTGCCC	58.29	2		This study
Lipid metabolism	Rv0860	fadB	fatty oxidation protein FadB	Involved in fatty acid degradation (probably in fatty acid beta-oxidation cycle)	fatty acid metabolism, benzoate, caprolactam and butanoate metabolism	lipid metabolism	fadB-F	TCCAGTGGGACAAGGATGC	59	2	74	This study
							fadB-R	CATCACGTTGGTTGACCCG	59	2		This study
Lipid metabolism	Rv0244c	fadE5	acyl-CoA dehydrogenase FadE5	Function unknown, but involved in lipid degradation	fatty acid metabolism, propanoate metabolism	lipid metabolism	fadE5-F	ACCCAGATGACCGACAAGAC	59.39	1	212	Guirado et al., 2015
							fadE5-R	ACTACCGGCAACATCAGGTC	59.75	1		Guirado et al., 2015
Lipid metabolism	Rv0162c	adhE1	zinc-type alcohol dehydrogenase (E subunit) AdhE1	Dehydrogeneses a alcohol (OXIDO-reduction) [catalytic activity: an alcohol + NAD+ = an aldehyde or ketone + NADH]	fatty acid metabolism, glycerolipid metabolism	intermediary metabolism and respiration	adhE1-F	TGACGTATACAGACGTTCG	54.56	2	95	This study
							adhE1-R	CGGTGTGTAGATCTCATGG	54.81	2		This study
Lipid metabolism	Rv3045	adhC	NADP-dependent alcohol dehydrogenase AdhC	Generates aldehyde or ketone from alcohol [catalytic activity: alcohol + NADP(+) = aldehyde or ketone + NADPH]	glycerolipid metabolism	intermediary metabolism and respiration	adhC-F	AACCGAATTACCCTGTGG	54.13	1	193	This study
							adhC-R	GAGTTGTAGGTGAAGTTTGC	54.13	2		This study
Lipid metabolism	Rv3696c	glpK	glycerol kinase GlpK (ATP:glycerol 3-phosphotransferase) (glycerokinase) (GK)	Acts in rate-limiting step in glycerol utilization. Key enzyme in the regulation of glycerol uptake and metabolism [catalytic activity: ATP + glycerol = ADP + glycerol 3-phosphate]	glycerolipid metabolism	intermediary metabolism and respiration	glpK-F	CGATTGTATGGCAGGATACC	55.78	2	117	This study
							glpK-R	CGCCAGAGAAATAAGTTGC	54.52	2		This study
Lipid metabolism	Rv3097c	lipY	PE-PGRS family protein, triacylglycerol lipase LipY (esterase/lipase) (triglyceride lipase) (tributyrase) (triglyceride lipase) (tributyrase)	Generates diacylglycerol and a fatty acid anion from triacylglycerol [catalytic activity: triacylglycerol + H(2)O = diacylglycerol + a fatty acid anion]	glycerolipid metabolism	PE/PPE	lipY-F	GCTGTCGTGGTTTCTTGG	56.35	0	84	This study
							lipY-R	CCGTCATAGGTGGTGTACTGG	59.86	0		This study
Lipid metabolism	Rv3130c	tgs1	Triacylglycerol synthase (diacylglycerol acyltransferase) Tgs1	Involved in synthesis of triacylglycerol	glycerolipid metabolism, TAG biosynthesis	lipid metabolism	tgs1-F	GACCATGCAGTCGCAATCC	59.28	1	126	This study
							tgs1-R	ATCTCACTGGCACCCTTGG	59.31	2		This study
Lipid metabolism	Rv1551	plsB1	acyltransferase PlsB1	Thought to be involved in lipid metabolism	glycerolipid and glycerophospholipid metabolism	lipid metabolism	plsB1-F	CCTGAACTTCTTTCCGATGG	56.14	2	86	This study
							plsB1-R	GGTAGACGGGAATATCTTTCG	55.69	2		This study
Lipid metabolism	Rv0564c	gpdA1	glycerol-3-phosphate dehydrogenase [NAD(P)+] GpdA1 (NAD(P)H-dependent glycerol-3-phosphate dehydrogenase) (NAD(P)H-dependent dihydroxyacetone-phosphate reductase)	Involved in de novo phospholipid biosynthesis; glycerol-3 phosphate formation [catalytic activity: SN-glycerol 3-phosphate + NAD(P)+ = glycerone phosphate + NAD(P)H]	glycerophospholipid metabolism	lipid metabolism	gpdA1-F	GCTATCAGCAATGTTTCGC	55.3	2	130	This study
							gpdA1-R	GATACCCAGCGAATAGCC	54.65	1		This study
Lipid metabolism	Rv2289	cdh	CDP-diacylglycerol pyrophosphatase Cdh (CDP-diacylglycerol diphosphatase) (CDP-diacylglycerol phosphatidylhydrolase)	Involved in phospholipid biosynthesis [catalytic activity: CDP-diacylglycerol + H(2)O = CMP + phosphatidate]	glycerophospholipid metabolism	lipid metabolism	cdh-F	GGTCGCAATTACCTCTACG	55.55	2	72	This study
							cdh-R	TGGAAGTGAGTTGTTCAGG	54.63	0		This study
Lipid metabolism	Rv2881c	cdsA	integral membrane phosphatidate cytidylyltransferase CdsA (CDP-diglyceride synthetase) (CDP-diglyceride pyrophosphorylase) (CDP-diacylglycerol synthase) (CDS) (CTP:phosphatidate cytidylyltransferase) (CDP-DAG synthase) (CDP-DG synthetase)	Involved in the phospholipid biosynthesis [catalytic activity: CTP + phosphatidate = pyrophosphate + CDP-diacylglycerol]	glycerophospholipid metabolism	lipid metabolism	cdsA-F	CGTTGTCTGCATGATTTGG	55.11	0	145	This study
							cdsA-R	GAAAGAGCAGAACAATGGG	53.97	0		This study
Lipid metabolism	Rv2612c	pgsA1	PI synthase PgsA1 (phosphatidylinositol synthase) (CDP-diacylglycerol--inositol-3-phosphatidyltransferase)	Catalyzes the transfer of a free alcohol (inositol) onto CDP-diacylglycerol. The product of this putative ORF seems be essential to mycobacteria [catalytic activity: CDP-diacylglycerol + myo-inositol = CMP + phosphatidyl 1D-myo-inositol]. PgsA1 utilises inositol-phosphate rather than inositol, in contrast to its Eukaryotic ortholog (see Gr&#228;ve et al. 2019)	glycerophospholipid metabolism	lipid metabolism	pgsA1-F	TCTGCTGTGGTGGATAGC	56.31	2	99	This study
							pgsA1-R	GCCTTGATGTAAGAGATCACC	56.12	2		This study
Lipid metabolism	Rv0436c	pssA	CDP-diacylglycerol--serine O-phosphatidyltransferase PssA (PS synthase) (phosphatidylserine synthase)	Involved in phospholipid biosynthesis. Generates phosphatidylserine [catalytic activity: CDP-diacylglycerol + L-serine = CMP + O-SN-phosphatidyl-L-serine]	glycerophospholipid metabolism	lipid metabolism	pssA-F	GGGAACGTCGATACTCTTGG	57.79	0	148	This study
							pssA-R	CACCCAGATCAACAAGTAGGG	58.01	0		This study
Lipid metabolism	Rv0437c	psd	phosphatidylserine decarboxylase Psd (PS decarboxylase)	Function unknown, but involved in lipid metabolism [catalytic activity: phosphatidyl-L-serine = phosphatidylethanolamine + CO(2)]	glycerophospholipid metabolism	lipid metabolism	psd-F	CACACGTCGGAGACAAGC	56	2	83	This study
							psd-R	CGCTGGCAGGTAGGTATCC	56.9	2		This study
Lipid metabolism	Rv3229c	desA3	linoleoyl-CoA desaturase (delta(6)-desaturase)	Thought to be involved in lipid metabolism [catalytic activity: linoleoyl-CoA + ah(2) + O(2) = gamma-linolenoyl-CoA + a + 2 H(2)O]	linoleic acid metabolism	lipid metabolism	desA3-F	AATCGAGCATCACCTCTATCC	57.05	0	95	This study
							desA3-R	ATGGCAAGTCGTATCTGTCG	57.79	2		This study
Carbohydrate metabolism	Rv3265c	wbbL	dTDP-RHA:a-D-GlcNAc-diphosphoryl polyprenol, a-3-L-rhamnosyl transferase WbbL1 (alpha-L-rhamnose-(1->3)-alpha-D-GlcNAc(1->P)-P-decaprenyl)	Probably involved in cell wall arabinogalactan linker formation: Uses dTDP-L-rhamnose as substrate to insert the rhamnosyl residue into the cell wall. Seems to be essential for mycobacterial viability	carbohydrate biosynthesis	cell wall and cell processes	wbbL-F	AGCACCTATATCTTCTTAGCC	54.3	1	149	This study
							wbbL-R	TCTACCAGCTTCAGTTTCC	54.09	0		This study
Carbohydrate metabolism	Rv2702	ppgK	Polyphosphate glucokinase PpgK (polyphosphate-glucose phosphotransferase)	Catalyzes the phosphorylation of glucose using polyphosphate or ATP as the phosphoryl donor. GTP, UTP and CTP can replace ATP as phosphoryl donor [catalytic activity: (phosphate)(N) + D-glucose = (phosphate)(N-1) + D-glucose 6-phosphate]	carbohydrate biosynthesis, glycolisis/gluconeogenesis	intermediary metabolism and respiration	ppgK-F	AAGGAAGCGGAGGAAAGG	59.36	0	70	This study
							ppgK-R	TGGCCCACTTTGGATAGG	59.45	0		This study
Carbohydrate metabolism	Rv3667	acs	Acetyl-coenzyme A synthetase Acs (acetate--CoA ligase) (acetyl-CoA synthetase) (acetyl-CoA synthase) (acyl-activating enzyme) (acetate thiokinase) (acetyl-activating enzyme) (acetate--coenzyme A ligase) (acetyl-coenzyme A synthase)	Activates acetate to acetyl-coenzyme A [catalytic activity: ATP + acetate + CoA = AMP + pyrophosphate + acetyl-CoA]	glycolysis and gluconeogenesis	intermediary metabolism and respiration	acs-F	CCTACAACTGTGTGGATCG	55.35	2	115	This study
							acs-R	GCAAGCAGATCGGAATAGG	55.87	0		This study
Carbohydrate metabolism	Rv0761c	adhB	zinc-containing alcohol dehydrogenase NAD dependent AdhB	Thought to catalyze the reversible oxidation of ethanol to acetaldehyde with the concomitant reduction of NAD. Probably acts on primary or secondary alcohols or hemiacetals [catalytic activity: an alcohol + NAD+ = an aldehyde or ketone + NADH]	Glycolysis/Gluconeogenesis, Fatty acid degradation, Chloroalkane and chloroalkene degradation, pyruvate, tyrosine and methane metabolism	intermediary metabolism and respiration	adhB-F	TGGAATGCGGAATCTGTGC	58	2	112	This study
							adhB-R	CAGGGTCATCGGGTAGACG	59	2		This study
Carbohydrate metabolism	Rv3255c	manA	mannose-6-phosphate isomerase ManA (phosphomannose isomerase) (phosphomannoisomerase) (PMI) (phosphohexoisomerase) (phosphohexomutase)	This enzyme converts D-mannose 6-phosphate to D-fructose 6-phosphate [catalytic activity: D-mannose 6-phosphate = D-fructose 6-phosphate]	Carbohydrate biosynthesis, fructose and mannose metabolism, ManLAM biosynthesis	intermediary metabolism and respiration	manA-F	TGTTCACCACCTGGATTACC	58.26	2	89	This study
							manA-R	GGAGCTGACGTACTGGATAGC	58.98	2		This study
Carbohydrate metabolism	Rv3264c	manB	D-alpha-D-mannose-1-phosphate guanylyltransferase ManB (D-alpha-D-heptose-1-phosphate guanylyltransferase)	Involved in GDP-mannose biosynthesis and biosynthesis of nucleotide-activated glycero-manno-heptose (D-alpha-D pathway): generates GDP-mannose and phosphate from GTP and alpha-D-mannose 1-phosphate. MANB product is needed for all mannosyl glycolipids and polysaccharides which, like rhamnosyl residues, are an important part of the mycobacterium envelope [catalytic activity: alpha-D-mannose 1-phosp…	Carbohydrate biosynthesis, fructose and mannose metabolism, ManLAM biosynthesis	cell wall and cell processes	manB-F	CTACAGATCGAATACGTGACC	55.74	1	110	This study
							manB-R	ACATCGCCGTTAAACACC	55.71	3		This study
Carbohydrate metabolism	Rv3257c	pmmA	phosphomannomutase PmmA (PMM) (phosphomannose mutase)	This enzyme converses D-mannose 1-phosphate in D-mannose 6-phosphate [catalytic activity: D-mannose 1-phosphate = D-mannose 6-phosphate]	Carbohydrate biosynthesis, fructose and mannose metabolism, ManLAM biosynthesis	intermediary metabolism and respiration	pmmA-F	TTACTTCCGTGACTTCTGG	54.15	0	121	This study
							pmmA-R	TTCATAGCGTTGGTAGTCC	54.31	1		This study
Carbohydrate metabolism	Rv3308	pmmB	phosphomannomutase PmmB (phosphomannose mutase)	Converts D-mannose 1-phosphate to D-mannose 6-phosphate	Carbohydrate biosynthesis, fructose and mannose metabolism, ManLAM biosynthesis	intermediary metabolism and respiration	pmmB-F	ATACAGATCACGGCGTCACA	59.18	1	203	Guirado et al., 2015
							pmmB-R	CGCTGGATATAACGGTCGAT	57.37	2		Guirado et al., 2015
Carbohydrate metabolism	Rv3631	Rv3631	Possible transferase (possibly glycosyltransferase)	Function unknown; probably involved in cellular metabolism	ManLAM biosynthesis	intermediary metabolism and respiration	Rv3631-F	CTTGACCGACACCAACAATG	57.31	3	224	Guirado et al., 2015
							Rv3631-R	GAAACCCGTCGAAAATGATG	55.38	1		Guirado et al., 2015
Carbohydrate metabolism	Rv2051c	ppm1	Polyprenol-monophosphomannose synthase Ppm1	Transfers mannose from GDP-mannose to all endogenous polyprenol-phosphates	carbohydrate biosynthesis, ManLAM biosynthesis	cell wall and cell processes	ppm1-F	CTCCAAGGGCTACTGCTTCC	60.11	0	93	This study
							ppm1-R	CGCTCGGTAAAGGTAATCG	55.95	2		This study
Carbohydrate metabolism	Rv3260c	whiB2	transcriptional regulatory protein WhiB-like WhiB2	Involved in transcriptional mechanism	Transcription factor, redox homeostasis	regulatory proteins	whiB2-F	GCACGAGTGTCTGGAGTACG	57.6	2	99	This study
							whiB2-R	ATGATCCCGCGTTTGAGG	54.9	0		This study
Carbohydrate metabolism	Rv3441c	mrsA	phospho-sugar mutase / MrsA protein homolog	Function unknown; involved in cellular metabolism	carbohydrate biosynthesis, mannose donor biosynthesis pathway, Amino sugar and nucleotide sugar metabolism, UDP-glucose biosynthesis	intermediary metabolism and respiration	mrsA-F	CGCTGGCAATGAAAGAGG	56.49	1	71	This study
							mrsA-R	CCCGAGGTTACTCATCACG	57.36	3		This study
Carbohydrate metabolism	Rv3068c	pgmA	phosphoglucomutase PgmA	This enzyme participates in both the breakdown and synthesis of glucose [catalytic activity: alpha-D-glucose 1-phosphate = alpha-D-glucose 6-phosphate]	Carbohydrate metabolism: carbohydrate biosynthesis, mannose donor biosynthesis pathway, Galactose metabolism, Glycolysis/ gluconeogenesis, penthose phosphate pathway, amino and nucleotide sugar metabolism	intermediary metabolism and respiration	pgmA-F	GGTCGGATTCAAATGGTTCG	57.17	2	90	This study
							pgmA-R	CGTCGCAGAAATGATGCC	57.02	1		This study
Carbohydrate metabolism	Rv0363c	fba	fructose-bisphosphate aldolase Fba	Involved in glycolysis (at the sixth step) [catalytic activity: D-fructose 1,6-bisphosphate = glycerone phosphate + D-glyceraldehyde 3-phosphate]	fructose and mannose metabolism	intermediary metabolism and respiration	fba-F	GGTGTCAAGAAGGTCTACG	54.98	2	117	This study
							fba-R	GTGGGTTAGGGACTTTCC	54.98	3		This study
Carbohydrate metabolism	Rv0727c	fucA	L-fuculose phosphate aldolase FucA (L-fuculose-1-phosphate aldolase)	Involved in fucose metabolism (at the third step) [catalytic activity: L-fuculose 1-phosphate = glycerone phosphate + (S)-lactaldehyde]	fructose and mannose metabolism	intermediary metabolism and respiration	fucA-F	GGAAATATCTCAGCCAGGCG	58.48	3	84	This study
							fucA-R	ATCGTGGAGCAGCATCTCG	59.93	3		This study
Carbohydrate metabolism	Rv3010c	pfkA	Probable 6-phosphofructokinase PfkA (phosphohexokinase) (phosphofructokinase)	Involved in glycolysis; converts sugar-1-P to sugar-1,6-P [catalytic activity: ATP + D-fructose 6-phosphate = ADP + D-fructose 1,6-bisphosphate].	Fructose and mannose, Galactose, Glycolysis/Gluconeogenesis, and penthose metabolism	intermediary metabolism and respiration	pfkA-F	TCACATGACCCTGATTCC	53.44	1	96	This study
							pfkA-R	CAGATGAAATGCGAGTCC	53.24	1		This study
Carbohydrate metabolism	Rv1099c	glpX	Fructose 1,6-bisphosphatase GlpX	Involved in gluconeogenesis [catalytic activity: fructose-1,6-bisphosphate + H2O = D-fructose-6-phosphate + phosphate]	glycolysis/ gluconeogenesis, fructose and mannose metabolism, penthose phosphate pathway	intermediary metabolism and respiration	glpX-F	TCAAAGCTCAACGAATACTCC	56	2	68	This study
							glpX-R	TAGGGCAATGGGTACACG	56.3	2		This study
Carbohydrate metabolism	Rv0620	galK	galactokinase GalK (galactose kinase)	Involved in galactose metabolism (leloir pathway) (at the first reaction) [catalytic activity: ATP + D-galactose = ADP + D-galactose 1-phosphate]	galactose metabolism	intermediary metabolism and respiration	galK-F	CTGACCGAGAATCAGCGGG	60.23	1	61	This study
							galK-R	CGGTGAAATCCGAATCAGCC	59.34	3		This study
Carbohydrate metabolism	Rv0618	galT	galactose-1-phosphate uridylyltransferase GalTa [first part]	Involved in galactose metabolism (leloir pathway) [catalytic activity: UTP + alpha-D-galactose 1-phosphate = diphosphate + UDP-galactose]	galactose metabolism	intermediary metabolism and respiration	galT-F	TGATCGGATGTATTCTTCACC	55.21	1	133	This study
							galT-R	CGCCAGATATTTCAGTTTGG	54.76	0		This study
Carbohydrate metabolism	Rv0993	galU	UTP--glucose-1-phosphate uridylyltransferase GalU (UDP-glucose pyrophosphorylase) (UDPGP) (alpha-D-glucosyl-1-phosphate uridylyltransferase) (uridine diphosphoglucose pyrophosphorylase)	May play a role in stationary phase survival [catalytic activity: UTP + alpha-D-glucose 1-phosphate = diphosphate + UDP-glucose]	galactose metabolism, pentose and glucuronate conversion	intermediary metabolism and respiration	galU-F	CGCATTTCGTGGAAGACC	56.54	0	106	This study
							galU-R	GATTCGACCTTGATCAGTGC	56.62	2		This study
Carbohydrate metabolism	Rv2471	aglA	alpha-glucosidase AglA (maltase) (glucoinvertase) (glucosidosucrase) (maltase-glucoamylase) (lysosomal alpha-glucosidase) (acid maltase)	Involved in sugar metabolism (hydrolysis of terminal, non-reducing 1,4-linked D-glucose residues with release of D-glucose)	galactose metabolism	intermediary metabolism and respiration	aglA-F	CAATCACGATGTGGGACGG	58.62	1	127	This study
							aglA-R	TTCCTGGCCGTTGTAGAGG	59.02	0		This study
Carbohydrate metabolism	Rv0211	pckA	iron-regulated phosphoenolpyruvate carboxykinase [GTP] PckA (phosphoenolpyruvate carboxylase) (PEPCK)(pep carboxykinase)	Rate-limiting gluconeogenic enzyme [catalytic activity: GTP + oxaloacetate = GDP + phosphoenolpyruvate + CO2]	citrate cycle, pyruvate metabolism	intermediary metabolism and respiration	pckA-F	CCGAGAAGCACAAGAACTCC	58.57	1	206	Guirado et al., 2015
							pckA-R	ACAGAACGGCACCACATACA	59.61	0		Guirado et al., 2015
Carbohydrate metabolism	Rv0462	lpdC	Dihydrolipoamide dehydrogenase LpdC (lipoamide reductase (NADH)) (lipoyl dehydrogenase) (dihydrolipoyl dehydrogenase) (diaphorase)	Involved in energy metabolism. Lipoamide dehydrogenase is the E3 component of pyruvate dehydrogenase and the alpha-ketoacid dehydrogenase complex [catalytic activity: dihydrolipoamide + NAD(+) = lipoamide + NADH]. Also involved in antioxidant defense; LPDC|Rv0462, DLAT|Rv2215, AHPD|Rv2429, and AHPC|Rv2428 constitute an NADH-dependent peroxidase and peroxynitrite reductase that provides protection…	citrate cycle, Glycolysis/Gluconeogenesis	intermediary metabolism and respiration	lpdC-F	CCTCAATGTCGGCTGTATCC	55.2	2	74	This study
							lpdC-R	CGTCCTTGGTGAAGATGTGG	55.7	0		This study
Carbohydrate metabolism	Rv0794c	Rv0794c	oxidoreductase	Function unknown; probably involved in cellular metabolism	citrate cycle, Glycine, serine and threonine metabolism, Glycolysis / Gluconeogenesis, Glyoxylate and dicarboxylate metabolism, pyruvate metabolism	intermediary metabolism and respiration	Rv0794c-F	CCCACCAAGGCAAATACC	55.59	2	145	This study
							Rv0794c-R	GGGTCGGTAAAGAATGCC	55.42	1		This study
Carbohydrate metabolism	Rv3075c	Rv3075c	Citrate lyase beta chain	Unknown	citrate cycle	conserved hypotheticals	Rv3075c-F	GAAATCGTCTGGGCGAAGG	58.62	0	190	This study
							Rv3075c-R	AGTGGTAGGTGTCAGTCGG	58.35	1		This study
Carbohydrate metabolism	Rv0248c	Rv0248c	Probable succinate dehydrogenase [iron-sulfur subunit] (succinic dehydrogenase)	Involved in interconversion of fumarate and succinate (aerobic respiration) [catalytic activity: succinate + acceptor = fumarate + reduced acceptor]	Butanoate and carbon metabolism, citrate cycle	intermediary metabolism and respiration	Rv0248c-F	AGTGTCAAGGGAATTCTGG	54.34	0	94	This study
							Rv0248c-R	GAATGTAGTCGAACATGAAGC	55.08	2		This study
Carbohydrate metabolism	Rv3339c	icd1	isocitrate dehydrogenase [NADP] Icd1 (oxalosuccinate decarboxylase) (IDH) (NADP+-specific ICDH) (IDP)	Involved in the KREBS cycle [catalytic activity: isocitrate + NADP(+) = 2-oxoglutarate + CO(2) + NADPH]	cytrate cycle, 2-Oxocarboxylic acid cycle, glutathione metabolism	intermediary metabolism and respiration	icd1-F	ATCTGTCCACCAAGAACACC	57.38	0	60	This study
							icd1-R	CGAACTCGTCTTTGAACATCC	59.73	0		This study
Carbohydrate metabolism	Rv3316	sdhC	succinate dehydrogenase (cytochrome B-556 subunit) SdhC (succinic dehydrogenase) (fumarate reductase) (fumarate dehydrogenase) (fumaric hydrogenase)	Involved in tricarboxylic acid cycle. Mono-heme cytochrome of the succinate dehydrogenase complex	cytrate cycle, Butanoate metabolism	intermediary metabolism and respiration	sdhC-F	TCCTGTTTGTCCATGTCC	54.04	2	163	This study
							sdhC-R	ATCAAGATGACCCGAATCC	54.31	2		This study
Carbohydrate metabolism	Rv1915	aceA	isocitrate lyase AceAa [first part] (isocitrase) (isocitratase) (Icl)	Involved in glyoxylate bypass, an alternative to the tricarboxylic acid cycle [catalytic activity: isocitrate = succinate + glyoxylate]	glyoxylate and dicarboxylate metabolism	intermediary metabolism and respiration	aceA-F	ACGTACCGTCCTACAAGTCC	56.64	0	94	This study
							aceA-R	AAGCGCATAGAGAAGATGACC	58.57	1		This study
Carbohydrate metabolism	Rv0467	icl1	Isocitrate lyase Icl (isocitrase) (isocitratase)	Involved in glyoxylate bypass (at the first step), an alternative to the tricarboxylic acid cycle (in bacteria, plants, and fungi) [catalytic activity: isocitrate = succinate + glyoxylate]. Involved in the persistence in the host	glyoxylate and dicarboxylate metabolism	intermediary metabolism and respiration	icl1-F	TCAAGTTCCAGTTCATCACG	55.71	2	111	This study
							icl1-R	CCTGCAGTTCGACATACG	55.63	2		This study
Carbohydrate metabolism	Rv0046c	ino1	myo-inositol-1-phosphate synthase Ino1 (inositol 1-phosphate synthetase) (D-glucose 6-phosphate cycloaldolase) (glucose 6-phosphate cyclase) (glucocycloaldolase)	Involved in phosphatidylinositol (PI) biosynthetic pathway [catalytic activity: D-glucose 6-phosphate = 1L-myo-inositol 1-phosphate]	inositol phosphate metabolism	intermediary metabolism and respiration	ino1-F	ATGGACTTCCTCAACATGC	55.16	2	60	This study
							ino1-R	GGTCTTGGAGATCTTCTTGG	55.15	2		This study
Others	Rv3423c	alr	Alanine racemase Alr	Provides the D-alanine required for cell wall biosynthesis. Transforms L-alanine to D-alanine [catalytic activity: L-alanine = D-alanine]	Amino acid metabolism: Alanine metabolism, Vancomycin resistance	intermediary metabolism and respiration	alr-F	AAACGACACGACAGATGG	55.02	0	116	This study
							alr-R	GCACGTTGTGTTCAATAGC	55.46	2		This study
Others	Rv0391	metZ	O-succinylhomoserine sulfhydrylase MetZ (OSH sulfhydrylase)	Involved in methionine biosynthesis. Converts O-succinylhomoserine into homocysteine	Amino acid metabolism: Cysteine and methionine metabolism	intermediary metabolism and respiration	metZ-F	TATGTGTACTCCCGCTACG	56	2	185	This study
							metZ-R	AAACACGAGCCAAACAGG	55.82	0		This study
Others	Rv1295	thrC	Threonine synthase ThrC (ts)	Involved in threonine biosynthesis [catalytic activity: O-phospho-L-homoserine + H(2)O = L-threonine + phosphate]	Amino acid metabolism: Glycine, serine and threonine metabolism, Vitamin B6 metabolism	intermediary metabolism and respiration	thrC-F	GGCAACTAATCTCTCCAAGC	56.2	2	96	This study
							thrC-R	ATCGTCATGCCACGATCC	57.24	2		This study
Others	Rv1381	pyrC	dihydroorotase PyrC (DHOase)	Involved in pyrimidine biosynthesis (third step) [catalytic activity: (S)-dihydroorotate + H(2)O = N-carbamoyl-L-aspartate]	Amino acid metabolism: Pyrimidine metabolism	intermediary metabolism and respiration	pyrC-F	GTGCTGATTCGTGGTGTGC	59	2	91	This study
							pyrC-R	GATCCGGTCCTATCTGGGC	59	2		This study
Others	Rv1601	hisB	imidazole glycerol-phosphate dehydratase HisB	Histidine biosynthesis (seventh step) [catalytic activity: D-erythro-1-(imidazol-4-YL)glycerol 3- phosphate = 3-(imidazol-4-YL)-2-oxopropyl phosphate + H(2)O]	Amino acid metabolism: Histidine metabolism	intermediary metabolism and respiration	hisB-F	CGATGGACGAAACACTGG	55.83	1	66	This study
							hisB-R	CGGTATGCACGCAATAGG	56.07	0		This study
Others	Rv1603	hisA	phosphoribosylformimino-5-aminoimidazole carboxamide ribotide isomerase HisA	Histidine biosynthesis pathway (fourth step) [catalytic activity: N-(5'-phospho-D-ribosylformimino)-5-amino-1-(5''-phosphoribosyl)-4-imidazolecarb oxamide = N-(5'-phospho-D-1'-ribulosylformimino)-5-amino-1-(5''-phosphoribosyl)-4- imidazolecarboxamide.]	Amino acid metabolism: Histidine metabolism, Phenylalanine, tyrosine and tryptophan biosynthesis	intermediary metabolism and respiration	hisA-F	TAGACAGTGAAGGATGTTCGC	57.77	2	83	This study
							hisA-R	CAGCAGGTCCAGATTGGG	57.35	2		This study
Others	Rv1655	argD	acetylornithine aminotransferase ArgD	Arginine biosynthesis (fourth step) [catalytic activity: N2-acetyl-L-ornithine + 2-oxoglutarate = N-acetyl-L-glutamate 5-semialdehyde + L-glutamate]	Amino acid metabolism: 2-Oxocarboxylic acid metabolism, Arginine biosynthesis, Lysine biosynthesis	intermediary metabolism and respiration	argD-F	GTGATGATGAACAACTACGG	54.16	1	100	This study
							argD-R	CGAGCAGGTCGATATAGG	53.77	2		This study
Others	Rv2589	gabT	4-aminobutyrate aminotransferase GabT (gamma-amino-N-butyrate transaminase) (GABA transaminase) (glutamate:succinic semialdehyde transaminase) (GABA aminotransferase) (GABA-at)	Involved in 4-aminobutyrate (GABA) degradation pathway [catalytic activity: 4-aminobutanoate + 2-oxoglutarate = succinate semialdehyde + L-glutamate]	Amino acid metabolism: GABA degradation, Alanine, aspartate and glutamate metabolism, Butanoate metabolism, Propanoate metabolism, Valine, leucine and isoleucine degradation	intermediary metabolism and respiration	gabT-F	CGAGCGCCATTGTCTTACC	58.99	0	171	This study
							gabT-R	AACGATGAAACCGCCTTCG	58.99	2		This study
Others	Rv0884c	serC	phosphoserine aminotransferase SerC (PSAT)	Catalyzes the reversible interconversion of phosphoserine and 2-oxoglutarate to 3-phosphonooxypyruvate and glutamate. Require both in the major phosphorylated pathway of serine biosynthesis and in pyridoxine biosynthesis [catalytic activity: O-phospho-L-serine + 2-oxoglutarate = 3-phosphonooxypyruvate + L-glutamate]	Carbohydrate metabolism/ Amino acid metabolism: Glycine, serine and threonine metabolism, Methane metabolism, Vitamin B6 metabolism, biosynthesis of amino acids	intermediary metabolism and respiration	serC-F	GCTGGGTTCCTGATTTCC	55.29	0	74	This study
							serC-R	CGGTGTGTTGTATGTCTGG	55.96	0		This study
Others	Rv0283	eccB3	ESX conserved component EccB3. ESX-3 type VII secretion system protein. Possible membrane protein	Unknown	ESX-3 secretion system	cell wall and cell processes	eccB3-F	GGCTGTTCAACGCGATACC	59.29	2	136	This study
							eccB3-R	TTGCCCGAGTCTTTCAGGG	59.63	1		This study
Others	Rv1984c	cfp21	cutinase precursor CFP21	Hydrolyzes cutin. Shown to have esterase and lipase activity	Not assigned	cell wall and cell processes	cfp21-F	AAGACCATAAACTTGTGTGC	54.11	2	82	This study
							cfp21-R	ACTGAACATACGAAACATGC	54.34	2		This study
Others	Rv2428	ahpC	Alkyl hydroperoxide reductase C protein AhpC (alkyl hydroperoxidase C)	Involved in oxidative stress response. LPDC|Rv0462, DLAT|Rv2215, AHPD|Rv2429, and AHPC|Rv2428 constitute an NADH-dependent peroxidase and peroxynitrite reductase that provides protection against oxidative stress. Response of Mtb to phagocytosis, tolerance by Mtb to nitric oxide produced by macrophages	Redox homeostasis	virulence, detoxification, adaptation	ahpC-F	CGCGTGACCTTTATCGTCG	59.09	3	185	This study
							ahpC-R	GAAGCCTTGAGGAGTTCGC	58.54	2		This study
Others	Rv0432	sodC	Periplasmic superoxide dismutase [Cu-Zn] SodC	Destroys radicals which are normally produced within the cells and are toxic to biological systems [catalytic activity: 2 superoxide + 2 H+ = O2 + H2O2]	Redox homeostasis	virulence, detoxification, adaptation	sodC-F	ACTTTGCCAACATTCCGCC	59.33	1	118	This study
							sodC-R	GAACCAATGACACCGCACG	59.79	2		This study
Others	Rv3082c	virS	Virulence-regulating transcriptional regulator VirS (AraC/XylS family)	May have a role in the regulation of proteins necessary for virulence	Not assigned	virulence, detoxification, adaptation	virS-F	CTACCTCTACGTCCATTCG	54.26	2	92	This study
							virS-R	GTTCGGTCACCTCATAGC	54.85	2		This study
Others	Rv3133c	dosR	Two component transcriptional regulatory protein DevR (probably LuxR/UhpA-family)	Regulator part of the two component regulatory system DEVR/DEVS/dost. Controls HSPX|Rv2031|ACR expression	Two-component system	regulatory proteins	dosR-F	GTCTGGTTGACTTGCTTGGG	59.05	0	150	This study
							dosR-R	ACAGTTCAATGCCGTTGCC	59.34	1		This study
Others	Rv0757	PhoP	two component system response transcriptional positive regulator PhoP	Involved in transcriptional mechanism. Part of the two component regulatory system PHOP/PHOQ. This protein is thought to be a positive regulator for the phosphate regulon, required for intracellular growth. Transcription of this operon is positively regulated by PHOB and PHOR|Rv0758 when phosphate is limited	Two-component system	regulatory proteins	phoP-F	GACAAAGCCCTTCAGTTTGG	54.3	0	88	This study
							phoP-R	ATTACGTGGTTCCTTGTTGC	53.7	2		This study
