# Supplementary material for: Host- and Age-Dependent Transcriptional Changes in Mycobacterium tuberculosis Cell Envelope Biosynthesis Genes after Exposure to Human Alveolar Lining Fluid
Source: Int J Mol Sci. 2022 Jan 17;23(2):983. doi: 10.3390/ijms23020983 (PMC8780516; doi:10.3390/ijms23020983)
Supplement: Supplementary file 1 [file ijms-23-00983-s001.zip › Supplemental Table S2.xlsx]

## Sheet: log2 fold changes Biomark
Category	Gene	A1	A2	A3	E1	E2	E3	A vs. E p-value	Statistical significance
Lipid metabolism	pimA	7.91749	5.27597	2.32129	1.22519	1.01939	1.99542	0.8905	ns
Lipid metabolism	pimF	23.6941	3.32131	1.5931	0.847129	1.26377	1.05623	0.7561	ns
Lipid metabolism	pgsA	14.8555	5.51055	2.47726	0.925409	0.859374	2.0675	0.8166	ns
Lipid metabolism	mgtA	10.2459	3.67371	2.41251	1.23501	1.16506	1.12396	0.8757	ns
Lipid metabolism	embC	12.7651	5.62524	2.12566	1.46916	1.17156	2.31378	0.8493	ns
Lipid metabolism	embR	198.304	7.00988	3.80225	1.03034	1.25717	1.05988	0.0124	*
Lipid metabolism	Rv1747	0.111621	0.145828	0.0938519	0.529124	1.54271	2.91343	0.9549	ns
Lipid metabolism	Rv2623	62.5381	3.76967	3.57489	0.868715	1.04143	0.869601	0.4129	ns
Lipid metabolism	acpM	183.183	5.29399	3.5964	1.2106	1.21882	1.32228	0.022	*
Lipid metabolism	kasA	168.697	5.10594	2.6764	1.08548	1.10136	1.60909	0.0357	*
Lipid metabolism	kasB	9.70355	3.66238	1.78539	0.791294	1.31869	1.16194	0.8847	ns
Lipid metabolism	pks13	32.6877	6.78467	3.42255	0.752247	0.81319	2.32152	0.6339	ns
Lipid metabolism	inhA	158.263	6.55484	3.30826	1.0472	1.21526	1.83094	0.0459	*
Lipid metabolism	fabH	0.305228	0.306092	0.309266	1.22633	1.11534	1.5055	0.9715	ns
Lipid metabolism	fabG4	14.1906	10.3332	3.68871	0.106583	0.483451	2.38409	0.758	ns
Lipid metabolism	fadA2	127.678	5.06897	4.50043	0.753104	1.1038	0.971982	0.1015	ns
Lipid metabolism	fadD25	0.481308	0.528025	0.497056	0.820858	1.37362	1.00717	0.9835	ns
Lipid metabolism	echA3	131.665	6.23205	3.27724	0.902136	1.10639	0.962969	0.0923	ns
Lipid metabolism	alkB	50.4451	4.30674	3.17821	0.394485	0.907488	1.43875	0.5006	ns
Lipid metabolism	fadB	103.7	5.01129	3.88468	0.807041	1.11953	0.752066	0.1802	ns
Lipid metabolism	fadE5	26.5567	5.76468	5.05654	0.598204	1.01714	1.26808	0.6737	ns
Lipid metabolism	adhE1	0.151808	0.438747	0.472796	1.0089	1.04742	1.41044	0.9766	ns
Lipid metabolism	glpK	0.0659781	0.137098	0.183858	0.0661553	0.932662	1.70139	0.9775	ns
Lipid metabolism	lipY	51.5523	6.46348	2.6813	1.09428	0.927259	1.02941	0.4817	ns
Lipid metabolism	tgs1	81.5457	3.81425	4.06171	0.631561	0.900662	1.02231	0.2893	ns
Lipid metabolism	plsB1	14.6834	2.27804	1.18451	1.03968	1.33581	1.42644	0.861	ns
Lipid metabolism	gpdA1	8.8387	2.91728	1.84113	0.794871	0.90613	1.27084	0.8968	ns
Lipid metabolism	cdh	6.79948	2.78331	2.10207	0.946438	0.860372	1.22795	0.9159	ns
Lipid metabolism	cdsA	0.0536931	0.208414	0.210393	0.796188	1.03247	1.64933	0.9707	ns
Lipid metabolism	pgsA1	13.0579	5.28741	3.25078	0.851937	0.766805	1.76439	0.824	ns
Lipid metabolism	pssA	56.9581	11.382	3.34294	0.581867	1.1144	2.80598	0.4123	ns
Lipid metabolism	psd	54.545	5.78911	3.50293	1.13693	0.998844	1.21962	0.4604	ns
Lipid metabolism	desA3	103.284	5.07501	5.14094	0.784872	0.826325	0.841189	0.1758	ns
Carbohydrate metabolism	wbbL	0.25229	0.327708	0.160272	0.041539	1.36564	2.09338	0.9731	ns
Carbohydrate metabolism	ppgK	0.377265	0.427002	0.577711	0.733723	1.16935	0.818044	0.987	ns
Carbohydrate metabolism	acs	1.86721	2.53686	1.70057	0.716207	0.798409	1.78702	0.9727	ns
Carbohydrate metabolism	adhB	120.977	5.65037	3.39749	0.727512	1.11389	1.16285	0.1217	ns
Carbohydrate metabolism	manA	59.1314	6.17886	3.96488	0.930508	0.773192	1.19711	0.418	ns
Carbohydrate metabolism	manB	60.9252	5.65299	4.14668	1.20717	0.9483	1.37181	0.4122	ns
Carbohydrate metabolism	pmmA	0.0262112	0.157886	0.203309	0.61159	1.26796	0.781855	0.9778	ns
Carbohydrate metabolism	Rv3631	14.2799	8.44756	3.17942	0.898486	1.07927	1.23532	0.7817	ns
Carbohydrate metabolism	ppm1	3.17938	1.07685	0.757281	1.12775	1.83326	0.708552	0.9869	ns
Carbohydrate metabolism	whiB2	100.723	5.31468	4.49886	0.773455	1.12276	0.851316	0.1888	ns
Carbohydrate metabolism	mrsA	71.0975	5.30945	3.20845	0.807817	1.10652	1.26478	0.351	ns
Carbohydrate metabolism	pgmA	182.656	6.5727	4.40219	0.966432	1.07999	1.00286	0.0205	*
Carbohydrate metabolism	fba	2.1451	0.355236	0.681882	0.801437	0.757038	0.764884	0.9916	ns
Carbohydrate metabolism	fucA	170.481	7.08537	5.47715	0.178153	1.08045	0.807545	0.0277	*
Carbohydrate metabolism	pfkA	0.0878992	0.0542938	0.0711803	0.624495	1.77491	1.09807	0.968	ns
Carbohydrate metabolism	glpX	28.0025	3.83091	2.83551	0.988027	1.16845	0.902833	0.6996	ns
Carbohydrate metabolism	galK	144.606	7.80391	3.6187	1.26547	0.882589	0.701587	0.0622	ns
Carbohydrate metabolism	galT	1.69361	1.6189	0.743503	1.22031	0.720138	1.50104	0.994	ns
Carbohydrate metabolism	galU	97.0011	9.67276	4.80403	0.886665	0.488315	1.74236	0.1864	ns
Carbohydrate metabolism	aglA	3.567	11.0593	3.68162	0.710095	0.789297	5.11022	0.8864	ns
Carbohydrate metabolism	pckA	15.5251	3.34193	3.96967	0.370724	0.980729	0.521756	0.798	ns
Carbohydrate metabolism	lpdC	95.9294	4.45987	2.42246	1.12582	1.41584	1.17444	0.2269	ns
Carbohydrate metabolism	Rv3075c	1.49534	5.74037	3.91387	0.45268	0.870144	1.3474	0.9175	ns
Carbohydrate metabolism	Rv0248c	2.13792	1.10918	0.911997	0.865	1.20145	1.24111	0.9917	ns
Carbohydrate metabolism	icd1	13.0768	1.06344	0.745739	1.13484	1.23935	1.18993	0.8901	ns
Carbohydrate metabolism	sdhC	0.0109969	0.0447482	0.0873963	0.540359	1.14691	0.868818	0.9765	ns
Carbohydrate metabolism	aceA	139.497	4.66512	2.84341	0.670663	1.09787	0.831163	0.0786	ns
Carbohydrate metabolism	icl1	50.3852	2.82642	4.14296	0.465572	0.734006	0.469117	0.4967	ns
Carbohydrate metabolism	ino1	1.33853	0.479602	0.495654	0.797248	1.81151	0.592861	0.9914	ns
Others	alr	31.8915	7.37368	5.27934	0.760367	0.954632	0.7116	0.6072	ns
Others	thrC	127.732	7.1702	3.6702	1.1421	0.971539	1.76444	0.1008	ns
Others	pyrC	164.169	9.08258	3.68416	1.34299	1.31543	1.33186	0.0354	*
Others	hisA	95.4843	6.32753	4.04309	1.12324	1.01848	1.85582	0.2142	ns
Others	hisB	78.2918	6.05261	4.10488	0.724813	1.01643	0.909069	0.2953	ns
Others	argD	3.84981	0.811433	2.66927	0.389224	0.381572	0.626167	0.9422	ns
Others	gabT	82.0724	8.70863	4.03952	1.06995	0.903733	1.52565	0.2653	ns
Others	serC	0.0637356	0.0681111	0.114534	0.779955	1.246	1.05084	0.9724	ns
Others	eccB3	312.93	10.6437	7.1779	1.06336	0.466062	1.24002	<0.0001	****
Others	cfp21	2.37951	1.29702	1.01366	0.946835	1.09369	1.02829	0.9842	ns
Others	ahpC	78.0429	8.31219	3.03027	1.13928	1.0956	1.27148	0.2948	ns
Others	sodC	121.8	8.59821	4.27425	1.17071	1.02127	1.57301	0.1107	ns
Others	virS	1.607	0.49533	1.23859	0.849756	1.00894	0.803759	0.9934	ns
Others	dosR	17.0751	4.23464	2.61971	0.588859	0.922501	1.4578	0.798	ns
Others	phoP	62.602	4.15547	3.48454	0.811433	1.04878	1.07524	0.4115	ns
