# Supplementary figures and images for: Host- and Age-Dependent Transcriptional Changes in Mycobacterium tuberculosis Cell Envelope Biosynthesis Genes after Exposure to Human Alveolar Lining Fluid
Source: MDPI journal article supplement (doi:10.3390/ijms23020983), 2022-01-17

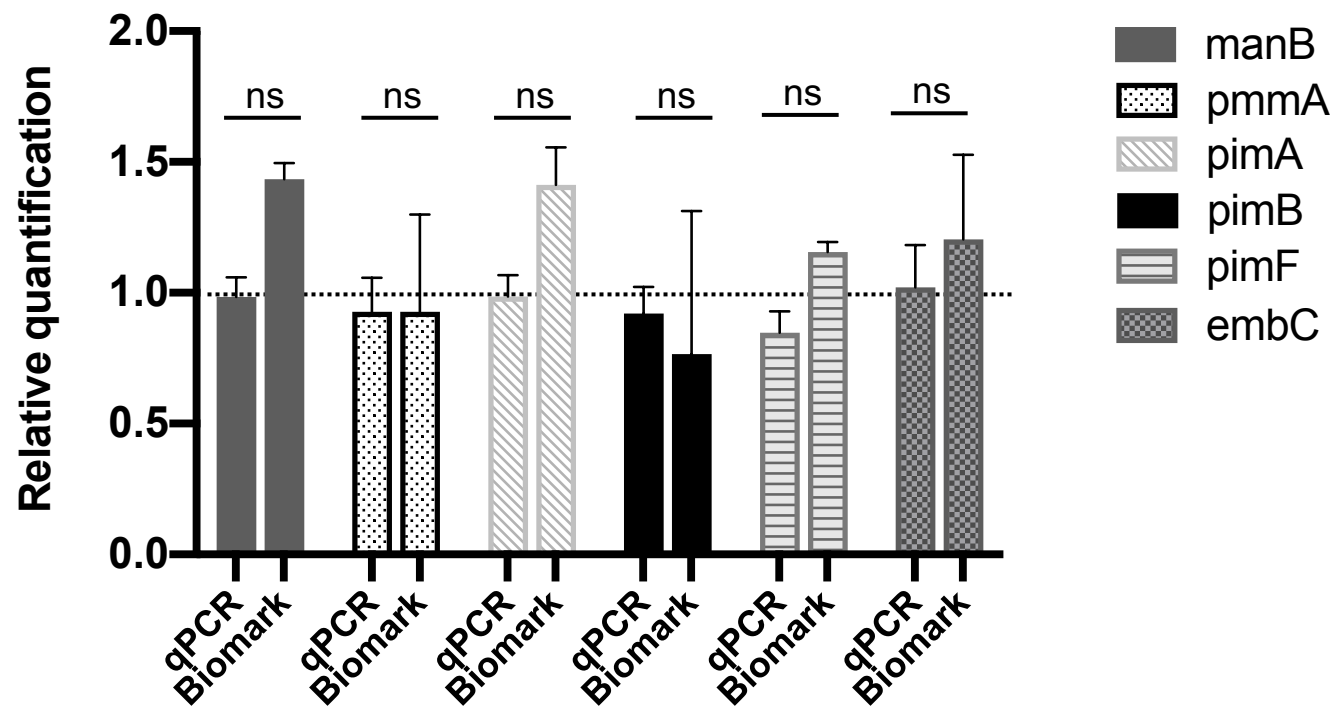

Supplement: s1 [file s1]
